# Supplementary material for: The Antiviral Molecule 5-Pyridoxolactone Identified Post BmNPV Infection of the Silkworm, Bombyx mori
Source: MDPI journal article supplement (doi:10.3390/ijms22147423), 2021-07-10
Supplement: s1 [file s1]

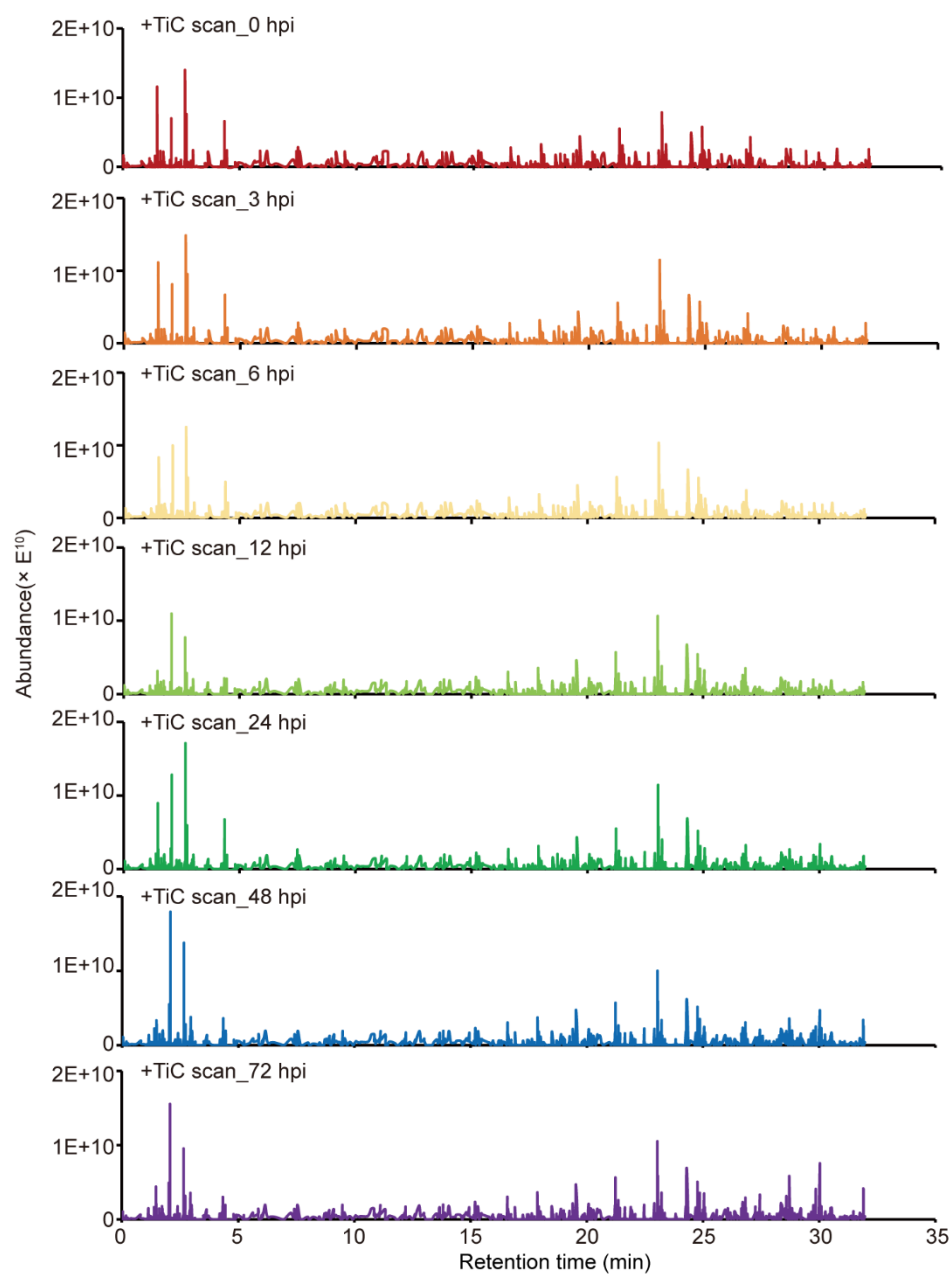

**Figure S1.** Total ion chromatograms (TICs) of BmE cells post BmNPV infection at different time.

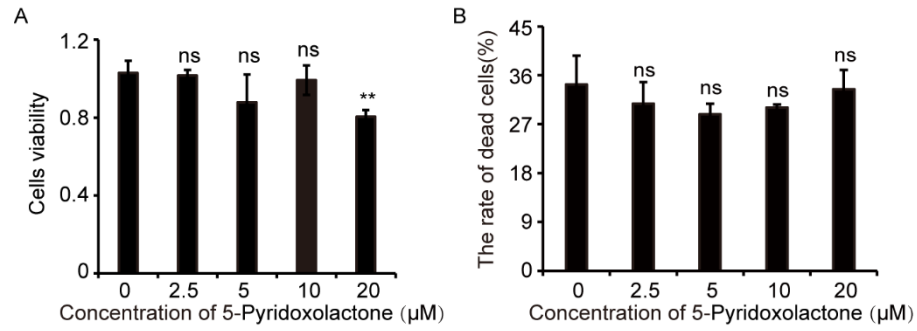

**Figure S2.** Cytotoxicity of 5-Pyridoxolactone in BmE and BmN4 cells. A. Cell variability of BmE cells treated with 0, 2.5, 5, 10, 20μM of 5-Pyridoxolactone was detected by CCK8; B. The rate of dead cells in BmE cells treated with 0, 2.5, 5, 10, 20μM of 5-Pyridoxolactone was detected by Live-Dead cell dyeing.
