# Supplementary material for: The Antiviral Molecule 5-Pyridoxolactone Identified Post BmNPV Infection of the Silkworm, Bombyx mori
Source: MDPI journal article supplement (doi:10.3390/ijms22147423), 2021-07-10
Supplement: s1 [file s1]

**Table S1.** Primers used in qRT-PCR

| Gene     | Forward primer          | Reverse primer        |
|----------|-------------------------|-----------------------|
| Ie1      | CACGGTCGCTTCAACTCAA     | TGTCGTCGAAACGCATCAA   |
| GP64     | CCATCGTGGAGACGGACTA     | CTCGCACTGCTGCCTGA     |
| VP39     | TAATGCCCCGTGGGTATGG     | GTTTGATGAGGTGGCTGTTGC |
| Helicase | AACACATGCCAAGCCGATAT    | TCCCGACACCGTTGACC     |
| GAPDH    | CATTCCGCGTCCCTGTTGCTAAT | GCTGCCTCCTTGACCTTTTGC |
