# Supplementary material for: The Antiviral Molecule 5-Pyridoxolactone Identified Post BmNPV Infection of the Silkworm, Bombyx mori
Source: MDPI journal article supplement (doi:10.3390/ijms22147423), 2021-07-10
Supplement: s1 [file s1]

**Table S3\_1. Differential metabolites identified in 3 hpi / 0 hpi.**

| <b>metabolites</b>                | <b>Fold change</b> | <b>VIP</b> | <b><i>p</i> value</b> |
|-----------------------------------|--------------------|------------|-----------------------|
| Uric acid                         | 0.19               | 2.46       | 9.63E-03              |
| Riboflavin cyclic-4',5'-phosphate | 0.37               | 2.29       | 2.87E-12              |
| beta-Estradiol 17-acetate         | 0.46               | 2.90       | 1.15E-03              |
| Tyramine-O-sulfate                | 2.03               | 4.86       | 3.83E-04              |
| (R)-glycerol 1-acetate            | 2.04               | 2.15       | 7.89E-03              |
| 5-Pyridoxolactone                 | 2.15               | 5.57       | 6.84E-03              |
| N-Acetylserine                    | 2.22               | 5.90       | 8.11E-05              |
| Pentadecanoic acid                | 2.48               | 2.52       | 1.87E-08              |
| Thiomorpholine 3-carboxylate      | 2.55               | 7.06       | 3.82E-03              |
| Glycerophosphocholine             | 2.84               | 3.46       | 3.92E-08              |
| 2-Carboxy-4-dodecanolide          | 2.86               | 2.18       | 3.94E-11              |
| Pentadecanoic acid                | 2.98               | 2.53       | 6.50E-09              |
| 5-Aminoimidazole ribonucleotide   | 3.78               | 2.29       | 3.39E-07              |
| Glycerophosphocholine             | 3.85               | 3.28       | 3.39E-08              |

**Table S3\_2. Differential metabolites identified in 6 hpi / 0 hpi.**

| <b>metabolites</b>                                             | <b>Fold change</b> | <b>VIP</b> | <b><i>p</i> value</b> |
|----------------------------------------------------------------|--------------------|------------|-----------------------|
| 5,7,9,11,13-tetradecapentaenoic acid                           | 0.30               | 2.38       | 5.19E-05              |
| S-Acetyldihydrolipoamide-E                                     | 0.33               | 4.43       | 3.21E-05              |
| L-Histidinol                                                   | 0.34               | 2.46       | 4.53E-03              |
| 3E,5E-tridecadienoic acid                                      | 0.40               | 3.94       | 1.31E-04              |
| PC(8:2(2E,4E)/8:2(2E,4E))                                      | 0.41               | 2.35       | 6.00E-09              |
| N-hydroxy arachidonoyl amine                                   | 0.47               | 2.06       | 2.17E-09              |
| 2,3-Dinor-6-keto-PGF1a                                         | 0.48               | 3.42       | 2.87E-09              |
| Hydroxytolbutamide                                             | 2.02               | 7.30       | 9.58E-07              |
| 2-hydroxy pelargonic acid                                      | 2.05               | 4.58       | 8.22E-05              |
| Traumatic acid                                                 | 2.15               | 2.78       | 4.06E-03              |
| Gamma-Glutamylcysteine                                         | 2.27               | 3.43       | 9.37E-12              |
| 5-Pyridoxolactone                                              | 2.34               | 4.96       | 2.63E-03              |
| Thiomorpholine 3-carboxylate                                   | 2.67               | 5.89       | 2.56E-03              |
| Glycerophosphocholine                                          | 3.31               | 3.24       | 1.05E-09              |
| 1-hexadecylpyridinium                                          | 3.51               | 3.71       | 7.18E-04              |
| Glycerophosphocholine                                          | 3.87               | 2.71       | 5.35E-07              |
| 2-Hydroxyadenine                                               | 4.14               | 3.81       | 9.20E-05              |
| 17-keto-7(Z),10(Z),13(Z),15(E),19(Z)-<br>Docosapentaenoic Acid | 9.57               | 3.02       | 6.24E-03              |

**Table S3\_3. Differential metabolites identified in 12 hpi / 0 hpi.**

| <b>metabolites</b>                                                   | <b>Fold change</b> | <b>VIP</b> | <b>p value</b> |
|----------------------------------------------------------------------|--------------------|------------|----------------|
| PC(8:2(2E,4E)/8:2(2E,4E))                                            | 0.08               | 2.26       | 1.53E-13       |
| cN-hydroxy arachidonoyl amine                                        | 0.08               | 2.10       | 6.96E-15       |
| 2,3-Dinor-6-keto-PGF1a                                               | 0.09               | 3.48       | 4.05E-15       |
| 7-oxo-11E-Tetradecenoic acid                                         | 0.09               | 2.05       | 1.08E-12       |
| Alpha-Lactose                                                        | 0.11               | 5.37       | 6.70E-11       |
| Formetanate                                                          | 0.11               | 2.59       | 4.20E-15       |
| Tyramine glucuronide                                                 | 0.13               | 2.02       | 3.33E-10       |
| Melamine                                                             | 0.15               | 2.14       | 1.33E-11       |
| Caffeic acid 4-O-glucuronide                                         | 0.16               | 4.60       | 1.36E-09       |
| Pantothenic acid                                                     | 0.16               | 2.28       | 2.39E-12       |
| 5-Methyl-THF                                                         | 0.16               | 5.23       | 3.45E-12       |
| Indoleacetic acid                                                    | 0.16               | 3.80       | 1.10E-09       |
| 4-Hydroxybenzaldehyde                                                | 0.17               | 2.58       | 1.68E-09       |
| 9Z,11E,13-Tetradecatrienal                                           | 0.17               | 3.67       | 1.56E-10       |
| Glutathione                                                          | 0.18               | 2.02       | 1.92E-14       |
| a-L-Arabinofuranosyl-(1->3)-[a-L-arabinofuranosyl-(1r5)]-L-arabinose | 0.19               | 2.72       | 3.38E-13       |
| Pilocarpine                                                          | 0.19               | 5.30       | 1.34E-11       |
| (S)-a-Amino-2,5-dihydro-5-oxo-4-isoxazolepropanoic acid              | 0.20               | 4.26       | 2.22E-15       |
| N2-glucoside                                                         |                    |            |                |
| 5-Deoxykievitone hydrate                                             | 0.20               | 2.08       | 3.04E-12       |
| 5,10-Methylene-THF                                                   | 0.20               | 3.26       | 8.27E-11       |
| D-Lactose                                                            | 0.21               | 3.16       | 4.15E-10       |
| L-Tyrosine                                                           | 0.22               | 2.45       | 4.66E-12       |
| beta-Estradiol 17-acetate                                            | 0.23               | 2.23       | 7.39E-05       |
| 3-b-Galactopyranosyl glucose                                         | 0.24               | 2.45       | 1.09E-11       |
| L-Tryptophan                                                         | 0.26               | 2.74       | 8.11E-12       |
| N-Acetyl-D-fucosamine                                                | 0.27               | 3.60       | 1.30E-10       |
| Indole                                                               | 0.27               | 2.38       | 1.86E-11       |
| L-Tryptophan                                                         | 0.27               | 10.33      | 1.36E-10       |
| 3-amino-2-naphthoic acid                                             | 0.27               | 12.26      | 1.45E-10       |
| Indoleacrylic acid                                                   | 0.27               | 2.19       | 6.13E-12       |
| 2-Oxosuberate                                                        | 0.28               | 4.27       | 2.41E-10       |
| Indole-3-carboxaldehyde                                              | 0.29               | 4.40       | 8.66E-11       |
| Furocoumarinic acid glucoside                                        | 0.29               | 4.20       | 7.32E-12       |
| Cellulose                                                            | 0.30               | 2.31       | 1.25E-12       |
| Ethyl Oxalacetate                                                    | 0.30               | 4.01       | 1.23E-07       |
| 4-Methoxybenzyl O-(2-sulfoglucoside)                                 | 0.30               | 8.01       | 9.62E-11       |
| 1,5-Naphthalenediamine                                               | 0.30               | 2.33       | 2.08E-10       |
| Sucrose                                                              | 0.30               | 24.47      | 9.70E-12       |
| 4-Hydroxy-1-(3-pyridinyl)-1-butanone                                 | 0.32               | 12.67      | 1.42E-07       |
| Phosphorylcholine                                                    | 0.34               | 2.14       | 1.27E-10       |

|                                                            |      |       |          |
|------------------------------------------------------------|------|-------|----------|
| Naptalam                                                   | 0.36 | 9.48  | 1.73E-10 |
| D-Mannitol                                                 | 0.36 | 2.41  | 2.24E-10 |
| 3-(4-Methyl-3-pentenyl)thiophene                           | 0.36 | 5.55  | 1.07E-09 |
| L-Phenylalanine                                            | 0.36 | 17.64 | 7.85E-10 |
| L-Tyrosine                                                 | 0.36 | 7.74  | 4.56E-10 |
| Benzofuran                                                 | 0.38 | 2.06  | 4.60E-10 |
| 2-Hydroxycinnamic acid                                     | 0.38 | 2.97  | 6.07E-11 |
| D-Glucose 6-phosphate                                      | 0.39 | 3.04  | 1.11E-11 |
| 4-O-Methyl-a-D-glucosyl-(1->2)-b-D-xylosyl-(1->4)-D-xylose | 0.41 | 2.31  | 3.25E-09 |
| 2-Hydroxymethylserine                                      | 0.41 | 3.76  | 4.57E-10 |
| Succinoadenosine                                           | 0.42 | 6.71  | 2.28E-10 |
| Lactulose                                                  | 0.43 | 18.12 | 8.98E-09 |
| 3,8-dimethyldec-7-en-1-yl trihydrogen diphosphate          | 0.44 | 2.75  | 2.45E-03 |
| 2-[3-Carboxy-3-(methylammonio)propyl]-L-histidine          | 0.44 | 3.55  | 6.07E-10 |
| 2,6-Dimethoxy-4-propylphenol                               | 0.46 | 2.07  | 4.28E-07 |
| L-Lysine                                                   | 0.47 | 2.82  | 1.02E-10 |
| N,N-dimethyl-Safingol                                      | 2.01 | 10.05 | 3.23E-05 |
| Tyramine-O-sulfate                                         | 2.02 | 3.08  | 6.82E-07 |
| Stearaldehyde                                              | 2.02 | 2.77  | 1.80E-04 |
| 1-Docosene                                                 | 2.03 | 4.74  | 3.19E-05 |
| Estra-1,3,5(10)-triene-3,6beta,17beta-triol triacetate     | 2.05 | 2.71  | 1.13E-03 |
| 3-Acrylamidopropyl trimethylammonium                       | 2.10 | 3.15  | 4.65E-04 |
| 3-hydroxy-tetracosanoic acid                               | 2.26 | 4.69  | 4.59E-05 |
| 4alpha-methyl-5alpha-cholestan-3beta-ol                    | 2.27 | 2.42  | 4.61E-05 |
| 2-amino-14,16-dimethyloctadecan-3-ol                       | 2.30 | 2.13  | 6.46E-05 |
| N-Acetylserine                                             | 2.33 | 3.81  | 5.15E-05 |
| Docosanoic acid                                            | 2.41 | 8.41  | 1.81E-05 |
| N,N,N-trimethyl-sphingosine                                | 2.42 | 4.13  | 2.02E-05 |
| PE(18:0/0:0)                                               | 2.43 | 4.33  | 7.83E-06 |
| LysoPC(14:1(9Z))                                           | 2.49 | 2.14  | 1.07E-05 |
| Didox                                                      | 2.58 | 2.30  | 1.14E-10 |
| Hydroxytolbutamide                                         | 2.73 | 7.35  | 2.10E-09 |
| 2S-aminohexadecanoic acid                                  | 2.83 | 3.87  | 1.21E-04 |
| Gamma-Glutamylcysteine                                     | 2.92 | 3.14  | 2.94E-06 |
| Glycerophosphocholine                                      | 3.06 | 2.35  | 1.05E-11 |
| Deamino- $\alpha$ -keto-demethylphosphinothricin           | 3.21 | 5.36  | 2.72E-05 |
| Choline                                                    | 3.45 | 3.45  | 6.31E-05 |
| (R)-glycerol 1-acetate                                     | 4.44 | 2.78  | 3.33E-05 |
| 2-Hydroxyadenine                                           | 4.89 | 3.25  | 1.88E-05 |

**Table S3\_4. Differential metabolites identified in 24 hpi / 0 hpi.**

| <b>metabolites</b>                               | <b>Fold change</b> | <b>VIP</b> | <b>p value</b> |
|--------------------------------------------------|--------------------|------------|----------------|
| beta-Estradiol 17-acetate                        | 0.26               | 2.37       | 1.77E-04       |
| (±)-3-Hydroxynonanoic acid                       | 0.33               | 2.33       | 8.47E-08       |
| 2,6-Dimethoxy-4-propylphenol                     | 0.34               | 2.52       | 4.87E-08       |
| Hexyl 2-furoate                                  | 0.35               | 2.32       | 4.24E-08       |
| S-Acetyldihydrolipoamide-E                       | 0.46               | 3.32       | 1.62E-04       |
| nicotinate beta-D-ribonucleotide                 | 2.04               | 3.52       | 2.63E-06       |
| Hydroxypropyl-Serine                             | 2.04               | 2.15       | 9.24E-09       |
| 1-Naphthaldehyde                                 | 2.10               | 2.22       | 9.26E-08       |
| Threonate                                        | 2.16               | 8.10       | 1.25E-11       |
| Nicotinamide adenine dinucleotide (NAD)          | 2.19               | 2.65       | 1.37E-10       |
| Inosine                                          | 2.22               | 3.36       | 8.60E-10       |
| Choline                                          | 2.24               | 2.79       | 1.26E-07       |
| Guanosine 3'-phosphate                           | 2.28               | 2.36       | 8.38E-10       |
| Acetylcarnitine                                  | 2.30               | 4.92       | 2.17E-17       |
| 13,14-dihydro-15-keto-tetranor PGE2              | 2.35               | 2.37       | 4.25E-10       |
| 5-Pyridoxolactone                                | 2.43               | 4.40       | 1.85E-03       |
| Thiomorpholine 3-carboxylate                     | 2.49               | 4.67       | 6.20E-03       |
| 3'-UMP                                           | 2.50               | 2.14       | 6.93E-09       |
| Guanine                                          | 2.57               | 4.70       | 1.15E-09       |
| Guanosine                                        | 2.61               | 3.85       | 3.86E-09       |
| Hydroxytolbutamide                               | 2.76               | 8.03       | 1.35E-06       |
| 4-Hydroxy-L-threonine                            | 2.79               | 2.65       | 3.57E-04       |
| S-Acetylphosphopantetheine                       | 2.85               | 2.77       | 7.63E-09       |
| Gamma-Glutamylcysteine                           | 2.85               | 3.44       | 2.13E-08       |
| deoxyguanosine 5'-monophosphate (dGMP)           | 2.89               | 13.08      | 7.50E-10       |
| (E)-2-O-Cinnamoyl-beta-D-glucopyranose           | 2.93               | 4.25       | 3.91E-10       |
| L-DOPA 3'-glucoside                              | 2.93               | 2.55       | 4.12E-11       |
| Adenosine                                        | 3.22               | 2.32       | 3.37E-09       |
| PE(14:0/22:5(4Z,7Z,10Z,13Z,16Z))                 | 5.03               | 2.09       | 6.93E-03       |
| 2-Hydroxyadenine                                 | 6.04               | 3.93       | 3.30E-04       |
| Vaccenyl carnitine                               | 6.34               | 2.09       | 9.43E-06       |
| 1α,25-dihydroxy-22-oxavitamin D3 3-hemiglutarate | 13.20              | 2.33       | 1.87E-03       |
| 7-Hydroxyenterolactone                           | 15.20              | 2.23       | 1.79E-10       |

**Table S3\_5. Differential metabolites identified in 48 hpi / 0 hpi.**

| metabolites                                             | Fold change | VIP   | p value  |
|---------------------------------------------------------|-------------|-------|----------|
| beta-Estradiol 17-acetate                               | 0.03        | 2.27  | 1.01E-05 |
| PC(8:2(2E,4E)/8:2(2E,4E))                               | 0.04        | 2.05  | 1.05E-13 |
| 2,3-Dinor-6-keto-PGF1a                                  | 0.06        | 3.16  | 3.09E-15 |
| Formetanate                                             | 0.09        | 2.35  | 3.53E-15 |
| Alpha-Lactose                                           | 0.17        | 4.63  | 1.73E-10 |
| Caffeic acid 4-O-glucuronide                            | 0.18        | 4.05  | 1.56E-09 |
| Indoleacetic acid                                       | 0.18        | 3.36  | 1.19E-09 |
| (S)-a-Amino-2,5-dihydro-5-oxo-4-isoxazolepropanoic acid | 0.19        | 3.82  | 5.05E-14 |
| N2-glucoside                                            |             |       |          |
| D-Glucoside                                             | 0.20        | 2.20  | 8.09E-08 |
| 9Z,11E,13-Tetradecatrienal                              | 0.21        | 3.21  | 2.21E-10 |
| D-Lactose                                               | 0.22        | 2.81  | 5.82E-10 |
| Pilocarpine                                             | 0.24        | 4.60  | 3.69E-11 |
| N-stearoyl taurine                                      | 0.24        | 3.08  | 1.49E-07 |
| Citric acid                                             | 0.24        | 2.30  | 4.10E-04 |
| Cellulose                                               | 0.26        | 2.12  | 3.80E-13 |
| L-Tyrosine                                              | 0.28        | 2.11  | 2.21E-11 |
| Furocoumarinic acid glucoside                           | 0.30        | 3.74  | 7.03E-12 |
| 2,6-Dimethoxy-4-propylphenol                            | 0.30        | 2.12  | 2.73E-08 |
| Sucrose                                                 | 0.31        | 21.81 | 1.05E-11 |
| 4-Hydroxybenzaldehyde                                   | 0.32        | 2.05  | 2.53E-06 |
| Indole                                                  | 0.33        | 2.04  | 7.73E-11 |
| 3-b-Galactopyranosyl glucose                            | 0.33        | 2.06  | 4.42E-11 |
| L-Tryptophan                                            | 0.34        | 2.32  | 3.63E-11 |
| Naptalam                                                | 0.35        | 8.51  | 1.49E-10 |
| N-Acetyl-D-fucosamine                                   | 0.37        | 2.98  | 1.03E-09 |
| L-Tryptophan                                            | 0.37        | 8.55  | 1.04E-09 |
| $\alpha$ -D-Glucose                                     | 0.37        | 3.07  | 1.54E-13 |
| 3-amino-2-naphthoic acid                                | 0.38        | 10.11 | 1.24E-09 |
| 2-Oxosuberate                                           | 0.38        | 3.52  | 1.93E-09 |
| Indole-3-carboxaldehyde                                 | 0.39        | 3.64  | 7.27E-10 |
| Succinoadenosine                                        | 0.40        | 6.10  | 5.25E-10 |
| D-Glucose 6-phosphate                                   | 0.40        | 2.69  | 2.59E-11 |
| Lactulose                                               | 0.41        | 16.39 | 1.53E-08 |
| Ethyl Oxalacetate                                       | 0.41        | 3.25  | 8.23E-07 |
| 5-Methyl-THF                                            | 0.43        | 3.85  | 3.09E-10 |
| 3,8-dimethyldec-7-en-1-yl trihydrogen diphosphate       | 0.44        | 2.44  | 2.59E-03 |
| 4-Hydroxy-1-(3-pyridinyl)-1-butanone                    | 0.45        | 10.13 | 1.19E-06 |
| Spermine                                                | 0.45        | 5.08  | 5.58E-09 |
| 5,10-Methylene-THF                                      | 0.46        | 2.39  | 3.14E-08 |
| Dihydro Isorescinnamine                                 | 2.04        | 3.18  | 3.26E-04 |
| Zalcitabine monophosphate                               | 2.04        | 6.53  | 4.11E-06 |

|                                         |      |       |          |
|-----------------------------------------|------|-------|----------|
| Brunfelsamidine                         | 2.05 | 2.22  | 4.07E-05 |
| Choline                                 | 2.06 | 2.02  | 6.14E-05 |
| Erucic acid                             | 2.08 | 4.63  | 1.89E-05 |
| N,N,N-trimethyl-sphingosine             | 2.10 | 3.23  | 2.13E-05 |
| Docosanoic acid                         | 2.11 | 6.64  | 1.52E-05 |
| (5-Phenyl-1,2,4-triazol-3-yl)urea       | 2.12 | 2.56  | 2.44E-12 |
| Palmitaldehyde                          | 2.13 | 4.73  | 1.37E-05 |
| Adenine                                 | 2.16 | 2.13  | 1.71E-10 |
| L-Proline                               | 2.16 | 7.98  | 3.40E-05 |
| (4E,d14:1) sphingosine                  | 2.17 | 4.12  | 5.16E-07 |
| 2-hydroxy-15Z-tetracosenoic acid        | 2.19 | 2.79  | 8.45E-06 |
| 5-Pyridoxolactone                       | 2.20 | 3.22  | 5.42E-03 |
| Calafatimine                            | 2.21 | 2.18  | 7.95E-05 |
| 2-butyl-6-pentylpiperidine              | 2.22 | 2.83  | 5.96E-06 |
| 2-Hexylbenzothiazole                    | 2.33 | 2.82  | 2.37E-13 |
| Sphingosine                             | 2.40 | 2.26  | 3.42E-06 |
| 13,14-dihydro-15-keto-tetranor PGE2     | 2.45 | 2.02  | 1.61E-11 |
| Topaquinone                             | 2.56 | 7.84  | 1.45E-14 |
| 4-Hydroxyxanthone                       | 2.57 | 2.18  | 8.95E-14 |
| Tyramine-O-sulfate                      | 2.58 | 3.41  | 8.25E-07 |
| L-Carnitine                             | 2.58 | 4.82  | 8.35E-11 |
| 11E,13-Tetradecadienal                  | 2.62 | 5.55  | 1.12E-07 |
| Tetrahydrodipicolinate                  | 2.65 | 2.21  | 5.90E-15 |
| L-2-Amino-6-oxoheptanedioate            | 2.66 | 5.87  | 2.05E-15 |
| 9Z,12Z,15Z-Octadecatrienal              | 2.68 | 2.20  | 1.23E-07 |
| Glymidine                               | 2.70 | 5.47  | 7.16E-17 |
| Adenosine 3'-monophosphate              | 2.71 | 2.95  | 3.17E-13 |
| Glutathione                             | 2.72 | 26.76 | 5.84E-17 |
| Inodxyl glucuronide                     | 2.77 | 3.00  | 1.30E-14 |
| L-DOPA 3'-glucoside                     | 2.78 | 2.01  | 4.07E-11 |
| PE(18:1(9Z)/0:0)                        | 2.80 | 6.39  | 4.82E-07 |
| Phosphocreatinine                       | 2.82 | 2.53  | 2.56E-10 |
| PE(17:2(9Z,12Z)/0:0)                    | 2.85 | 3.27  | 4.10E-07 |
| 1-Naphthaldehyde                        | 2.93 | 2.43  | 7.85E-16 |
| L-L-Homoglutathione                     | 2.94 | 3.46  | 4.79E-15 |
| 4-Hydroxy-L-threonine                   | 2.94 | 5.82  | 8.81E-11 |
| PE(16:0/0:0)                            | 2.94 | 3.44  | 2.85E-07 |
| Didox                                   | 2.96 | 2.29  | 1.93E-13 |
| Didox                                   | 3.09 | 2.18  | 1.52E-12 |
| Inosine                                 | 3.14 | 4.94  | 3.18E-13 |
| Uridine diphosphate-N-acetylglucosamine | 3.23 | 2.91  | 1.90E-13 |
| PC(18:1(9Z)/0:0)                        | 3.28 | 5.55  | 7.06E-08 |
| L-Glutamate                             | 3.29 | 7.97  | 1.55E-13 |
| LysoPE(20:2(11Z,14Z)/0:0)               | 3.32 | 2.91  | 9.39E-08 |

|                                                        |      |       |          |
|--------------------------------------------------------|------|-------|----------|
| 3'-UMP                                                 | 3.35 | 2.21  | 6.50E-12 |
| LysoPC(16:1(9Z))                                       | 3.39 | 3.73  | 2.74E-08 |
| Succinic acid                                          | 3.48 | 4.73  | 7.85E-09 |
| Nicotinamide adenine dinucleotide (NAD)                | 3.49 | 3.13  | 1.36E-13 |
| Uracil                                                 | 3.49 | 3.23  | 4.67E-12 |
| nicotinate beta-D-ribonucleotide                       | 3.59 | 4.48  | 9.12E-06 |
| S-(Hydroxymethyl)glutathione                           | 3.65 | 4.66  | 2.69E-13 |
| Hydroxypropyl-Serine                                   | 3.66 | 2.81  | 1.55E-08 |
| Uridine diphosphate-N-acetylglucosamine                | 3.71 | 3.14  | 3.26E-13 |
| Phosphocreatinine                                      | 3.82 | 2.23  | 2.73E-10 |
| PE(18:0/0:0)                                           | 3.88 | 5.56  | 2.30E-07 |
| Guanosine                                              | 4.03 | 2.39  | 1.37E-10 |
| LysoPC(14:1(9Z))                                       | 4.06 | 2.78  | 2.14E-07 |
| PC(18:1(6Z)/0:0)                                       | 4.16 | 6.97  | 3.01E-08 |
| Gamma-Glutamylcysteine                                 | 4.18 | 3.67  | 3.48E-08 |
| N-Acetylserine                                         | 4.22 | 5.40  | 9.01E-06 |
| LysoPE(0:0/20:2(11Z,14Z))                              | 4.23 | 3.73  | 3.60E-08 |
| (R)-glycerol 1-acetate                                 | 4.25 | 2.27  | 8.98E-04 |
| Hydroxytolbutamide                                     | 4.33 | 9.16  | 8.64E-13 |
| PC(20:4(5Z,8Z,11Z,14Z)/0:0)                            | 4.42 | 2.84  | 2.46E-08 |
| S-Acetylphosphopantetheine                             | 4.54 | 3.16  | 3.69E-17 |
| PE(18:1(9Z)/0:0)                                       | 4.57 | 2.53  | 1.28E-09 |
| LysoPC(16:0)                                           | 4.61 | 4.95  | 1.04E-09 |
| UDP-N-acetyl-D-galactosamine                           | 4.63 | 3.09  | 2.37E-11 |
| Xanthine-8-carboxylate                                 | 4.70 | 3.28  | 2.80E-11 |
| Guanosine 3'-phosphate                                 | 4.85 | 3.36  | 3.78E-14 |
| 4-Hydroxy-L-threonine                                  | 4.87 | 3.32  | 2.00E-05 |
| Adenylosuccinate                                       | 4.88 | 4.47  | 2.15E-11 |
| Inosine 5'-monophosphate (IMP)                         | 5.07 | 2.34  | 6.54E-10 |
| (E)-2-O-Cinnamoyl-beta-D-glucopyranose                 | 5.10 | 5.08  | 9.03E-12 |
| LysoPC(18:3(6Z,9Z,12Z))                                | 5.18 | 2.06  | 1.11E-09 |
| D-Glycerol 1-phosphate                                 | 5.20 | 2.96  | 1.74E-13 |
| deoxyguanosine 5'-monophosphate (dGMP)                 | 5.69 | 16.89 | 3.37E-12 |
| PG(18:2(9Z,12Z)/0:0)                                   | 5.72 | 2.86  | 3.92E-03 |
| Xanthine                                               | 5.85 | 3.96  | 8.83E-12 |
| 3-Methylthiopropyl-desulfoglucosinolate                | 6.18 | 2.19  | 2.25E-11 |
| Threonate                                              | 6.23 | 14.13 | 2.32E-17 |
| Inosine                                                | 6.26 | 5.74  | 3.53E-16 |
| Glycerophosphocholine                                  | 7.10 | 2.72  | 2.17E-10 |
| D-Glycerol 1-phosphate                                 | 7.52 | 2.53  | 5.75E-15 |
| Guanine                                                | 8.27 | 8.31  | 2.17E-16 |
| Glycerophosphocholine                                  | 8.58 | 4.02  | 4.66E-14 |
| p-Cresol glucuronide                                   | 8.66 | 2.27  | 7.85E-18 |
| N-(2'-(4-benzenesulfonamide)-ethyl) arachidonoyl amine | 8.81 | 2.65  | 7.82E-03 |



|                                                           |       |      |          |
|-----------------------------------------------------------|-------|------|----------|
| Guanosine                                                 | 8.93  | 7.03 | 6.13E-18 |
| S-Adenosylmethionine                                      | 10.03 | 2.40 | 1.47E-13 |
| 5-Aminoimidazole ribonucleotide                           | 10.38 | 2.38 | 3.70E-11 |
| Cytosine                                                  | 10.50 | 3.07 | 2.73E-15 |
| Adenosine                                                 | 15.34 | 4.84 | 2.84E-13 |
| Deoxyadenosine monophosphate                              | 16.52 | 3.76 | 2.01E-16 |
| Cytidine                                                  | 20.16 | 3.09 | 7.45E-15 |
| 1 $\alpha$ ,25-dihydroxy-22-oxavitamin D3 3-hemiglutarate | 23.15 | 2.64 | 5.37E-04 |
| UDP-N-acetyl-3-(1-carboxyvinyl)-D-glucosamine             | 23.35 | 2.29 | 1.66E-11 |
| 2-Hydroxyadenine                                          | 30.34 | 8.29 | 3.01E-13 |

---

**Table S3\_6. Differential metabolites identified in 72 hpi / 0 hpi.**

| metabolites                                             | Fold change | VIP   | p value  |
|---------------------------------------------------------|-------------|-------|----------|
| beta-Estradiol 17-acetate                               | 0.04        | 2.22  | 1.09E-05 |
| 4-Hydroxybenzaldehyde                                   | 0.13        | 2.31  | 1.18E-07 |
| 2,3-Dinor-6-keto-PGF1a                                  | 0.16        | 2.95  | 6.41E-14 |
| Formetanate                                             | 0.20        | 2.18  | 1.34E-13 |
| (S)-a-Amino-2,5-dihydro-5-oxo-4-isoxazolepropanoic acid | 0.22        | 3.69  | 8.43E-14 |
| N2-glucoside                                            |             |       |          |
| Indoleacetic acid                                       | 0.23        | 3.21  | 2.49E-09 |
| Caffeic acid 4-O-glucuronide                            | 0.23        | 3.85  | 3.63E-09 |
| Alpha-Lactose                                           | 0.25        | 4.32  | 5.07E-10 |
| D-Glucoside                                             | 0.26        | 2.09  | 1.61E-07 |
| 2,6-Dimethoxy-4-propylphenol                            | 0.27        | 2.14  | 1.66E-08 |
| D-Lactose                                               | 0.28        | 2.67  | 1.16E-09 |
| Pilocarpine                                             | 0.30        | 4.36  | 1.15E-10 |
| 9Z,11E,13-Tetradecatrienal                              | 0.34        | 2.88  | 6.25E-09 |
| L-Tryptophan                                            | 0.36        | 2.25  | 7.83E-11 |
| 5-Methyl-THF                                            | 0.37        | 3.98  | 5.08E-11 |
| $\alpha$ -D-Glucose                                     | 0.38        | 3.01  | 1.72E-11 |
| N-Acetyl-D-fucosamine                                   | 0.40        | 2.87  | 1.74E-09 |
| L-Tryptophan                                            | 0.40        | 8.22  | 2.00E-09 |
| Furocoumarinic acid glucoside                           | 0.41        | 3.38  | 1.94E-10 |
| 3-amino-2-naphthoic acid                                | 0.41        | 9.68  | 2.55E-09 |
| Sucrose                                                 | 0.41        | 19.71 | 3.01E-10 |
| 2-Oxosuberate                                           | 0.42        | 3.36  | 4.26E-09 |
| Indole-3-carboxaldehyde                                 | 0.42        | 3.49  | 1.44E-09 |
| Naptalam                                                | 0.43        | 7.83  | 2.41E-09 |
| 5,10-Methylene-THF                                      | 0.45        | 2.37  | 6.69E-09 |
| Ethyl Oxalacetate                                       | 0.45        | 3.10  | 1.70E-06 |
| Succinoadenosine                                        | 0.47        | 5.58  | 4.38E-08 |
| 5-(2-Hydroxyethyl)-4-methylthiazole acetate             | 0.48        | 2.28  | 9.08E-12 |
| Lactulose                                               | 0.48        | 15.16 | 1.47E-07 |
| Nicotinic acid                                          | 0.48        | 2.35  | 5.09E-13 |
| 4-Hydroxy-1-(3-pyridinyl)-1-butanone                    | 0.49        | 9.59  | 9.20E-06 |
| 3-(4-Methyl-3-pentenyl)thiophene                        | 0.49        | 4.34  | 1.49E-08 |
| 2-Acetylpyrazine                                        | 0.50        | 4.22  | 6.40E-09 |
| L-Phenylalanine                                         | 0.50        | 13.74 | 1.03E-08 |
| N2-Acetyl-L-aminoadipate                                | 2.00        | 2.49  | 3.49E-11 |
| 3-hydroxy-tetracosanoic acid                            | 2.02        | 3.82  | 3.86E-04 |
| Calafatimine                                            | 2.06        | 2.06  | 1.84E-04 |
| Erucic acid                                             | 2.07        | 4.65  | 2.26E-04 |
| Adenine                                                 | 2.09        | 2.03  | 4.40E-11 |
| Hexyl dodecanoate                                       | 2.14        | 9.31  | 1.27E-05 |
| 2-hydroxy-15Z-tetracosenoic acid                        | 2.15        | 2.74  | 2.64E-05 |

|                                         |      |       |          |
|-----------------------------------------|------|-------|----------|
| 2-butyl-6-pentylpiperidine              | 2.26 | 2.91  | 3.87E-07 |
| 2-Hexylbenzothiazole                    | 2.29 | 2.73  | 1.03E-12 |
| (5-Phenyl-1,2,4-triazol-3-yl)urea       | 2.30 | 2.73  | 7.94E-13 |
| 5-Pyridoxolactone                       | 2.36 | 3.40  | 2.43E-03 |
| Glymidine                               | 2.39 | 4.88  | 1.19E-14 |
| LysoPE(20:2(11Z,14Z)/0:0)               | 2.41 | 2.26  | 6.30E-07 |
| Glutathione                             | 2.41 | 23.89 | 1.05E-14 |
| PC(18:1(9Z)/0:0)                        | 2.42 | 4.35  | 8.12E-07 |
| LysoPC(16:1(9Z))                        | 2.42 | 2.87  | 2.40E-08 |
| Inodxyl glucuronide                     | 2.46 | 2.69  | 1.00E-12 |
| PE(16:0/0:0)                            | 2.47 | 2.97  | 3.98E-06 |
| Hydroxypropyl-Serine                    | 2.48 | 2.08  | 6.33E-12 |
| Succinic acid                           | 2.49 | 3.65  | 1.00E-10 |
| PE(18:1(9Z)/0:0)                        | 2.51 | 5.85  | 3.08E-06 |
| PE(17:2(9Z,12Z)/0:0)                    | 2.56 | 3.00  | 2.57E-06 |
| Gamma-Glutamylcysteine                  | 2.60 | 2.59  | 2.66E-11 |
| 1-Naphthaldehyde                        | 2.62 | 2.19  | 5.54E-14 |
| Adenosine 3'-monophosphate              | 2.73 | 2.93  | 3.95E-11 |
| Topaquinone                             | 2.86 | 8.46  | 1.74E-12 |
| L-L-Homoglutathione                     | 2.86 | 3.35  | 1.04E-13 |
| L-Glutamate                             | 2.87 | 7.11  | 1.62E-13 |
| 4-Hydroxyxanthone                       | 2.88 | 2.36  | 1.81E-12 |
| Tetrahydrodipicolinate                  | 2.95 | 2.37  | 3.20E-12 |
| L-2-Amino-6-oxoheptanedioate            | 2.96 | 6.31  | 1.93E-12 |
| Palmitoleoyl-EA                         | 3.03 | 2.19  | 1.43E-09 |
| Didox                                   | 3.03 | 2.31  | 1.46E-13 |
| Inosine                                 | 3.04 | 4.77  | 3.62E-13 |
| Didox                                   | 3.06 | 2.14  | 1.19E-14 |
| Nicotinamide adenine dinucleotide (NAD) | 3.13 | 2.86  | 1.19E-12 |
| N-Acetylserine                          | 3.17 | 4.35  | 3.92E-05 |
| LysoPC(16:0)                            | 3.18 | 3.81  | 3.26E-08 |
| L-Carnitine                             | 3.20 | 5.62  | 1.25E-11 |
| Xanthine-8-carboxylate                  | 3.33 | 2.57  | 1.68E-10 |
| Uracil                                  | 3.37 | 3.12  | 2.20E-13 |
| PC(18:1(6Z)/0:0)                        | 3.41 | 6.05  | 5.73E-08 |
| LysoPE(0:0/20:2(11Z,14Z))               | 3.45 | 3.24  | 4.52E-08 |
| PE(18:0/0:0)                            | 3.47 | 5.13  | 1.62E-06 |
| 4-Hydroxy-L-threonine                   | 3.61 | 2.46  | 6.04E-03 |
| LysoPC(14:1(9Z))                        | 3.63 | 2.57  | 1.60E-06 |
| PC(20:4(5Z,8Z,11Z,14Z)/0:0)             | 3.64 | 2.48  | 1.75E-08 |
| Guanosine                               | 3.65 | 2.21  | 9.18E-11 |
| S-(Hydroxymethyl)glutathione            | 3.71 | 4.60  | 9.66E-06 |
| Uridine diphosphate-N-acetylglucosamine | 3.75 | 3.20  | 4.76E-14 |
| Oleamide                                | 3.81 | 7.07  | 1.70E-07 |

|                                                        |       |       |          |
|--------------------------------------------------------|-------|-------|----------|
| Hydroxytolbutamide                                     | 3.87  | 8.39  | 4.41E-12 |
| Guanosine 3'-phosphate                                 | 4.19  | 3.02  | 1.04E-13 |
| Xanthine                                               | 4.22  | 3.19  | 2.44E-12 |
| (E)-2-O-Cinnamoyl-beta-D-glucopyranose                 | 4.27  | 4.46  | 3.58E-10 |
| ADP                                                    | 4.47  | 2.46  | 4.18E-03 |
| Uridine diphosphate-N-acetylglucosamine                | 4.53  | 3.54  | 4.17E-14 |
| D-Glycerol 1-phosphate                                 | 4.62  | 2.71  | 2.98E-12 |
| Inosine 5'-monophosphate (IMP)                         | 5.12  | 2.33  | 4.79E-11 |
| p-Hydroxynorpropoxyphene                               | 5.17  | 2.23  | 2.63E-14 |
| deoxyguanosine 5'-monophosphate (dGMP)                 | 5.19  | 15.79 | 2.88E-14 |
| S-Acetylphosphopantetheine                             | 5.32  | 3.44  | 3.63E-14 |
| Adenylosuccinate                                       | 5.35  | 4.68  | 1.32E-09 |
| 3-Methylthiopropyl-desulfoglucosinolate                | 5.66  | 2.05  | 3.66E-13 |
| UDP-N-acetyl-D-galactosamine                           | 5.76  | 3.50  | 6.56E-13 |
| Threonate                                              | 5.99  | 13.64 | 8.91E-15 |
| Inosine                                                | 6.32  | 5.70  | 4.45E-14 |
| D-Glycerol 1-phosphate                                 | 6.57  | 2.31  | 1.23E-15 |
| Guanine                                                | 7.82  | 7.95  | 2.93E-14 |
| PS(17:1(9Z)/0:0)                                       | 7.94  | 2.12  | 9.67E-03 |
| PG(18:2(9Z,12Z)/0:0)                                   | 8.04  | 3.80  | 9.38E-03 |
| p-Cresol glucuronide                                   | 8.34  | 2.20  | 1.16E-13 |
| N-(2'-(4-benzenesulfonamide)-ethyl) arachidonoyl amine | 8.37  | 2.02  | 9.91E-03 |
| Glycerophosphocholine                                  | 8.51  | 2.98  | 1.89E-11 |
| Guanosine                                              | 8.64  | 6.81  | 8.75E-14 |
| Adenosine                                              | 9.10  | 3.59  | 1.19E-11 |
| S-Adenosylmethionine                                   | 9.31  | 2.27  | 1.24E-13 |
| Glycerophosphocholine                                  | 9.62  | 4.24  | 2.35E-17 |
| Cytosine                                               | 11.37 | 3.16  | 4.59E-13 |
| 5-Aminoimidazole ribonucleotide                        | 12.23 | 2.58  | 2.00E-12 |
| N-(2'-(4-benzenesulfonamide)-ethyl) arachidonoyl amine | 12.49 | 3.56  | 8.36E-03 |
| PG(15:0/0:0)                                           | 12.60 | 2.01  | 8.53E-03 |
| Deoxyadenosine monophosphate                           | 16.02 | 3.64  | 2.49E-11 |
| Cytidine                                               | 22.36 | 3.22  | 2.39E-14 |
| 1 $\alpha$ ,25-dihydroxy-22-oxavitamin D3              | 27.88 | 2.94  | 4.03E-03 |
| 3-hemiglutarate                                        |       |       |          |
| 2-Hydroxyadenine                                       | 28.84 | 7.98  | 1.83E-12 |
| 2E,4E-tetradecadienoic acid                            | 29.23 | 2.24  | 5.15E-10 |
